# Supplementary material for: Multicomponent flux growth and composition control of Cu2MnBO5:Ga ludwigites
Source: Royal Society of Chemistry journal article supplement (doi:10.1039/d2ce00258b), 2022-01-01
Supplement: d2ce00258b1.pdf [file d2ce00258b1.pdf]

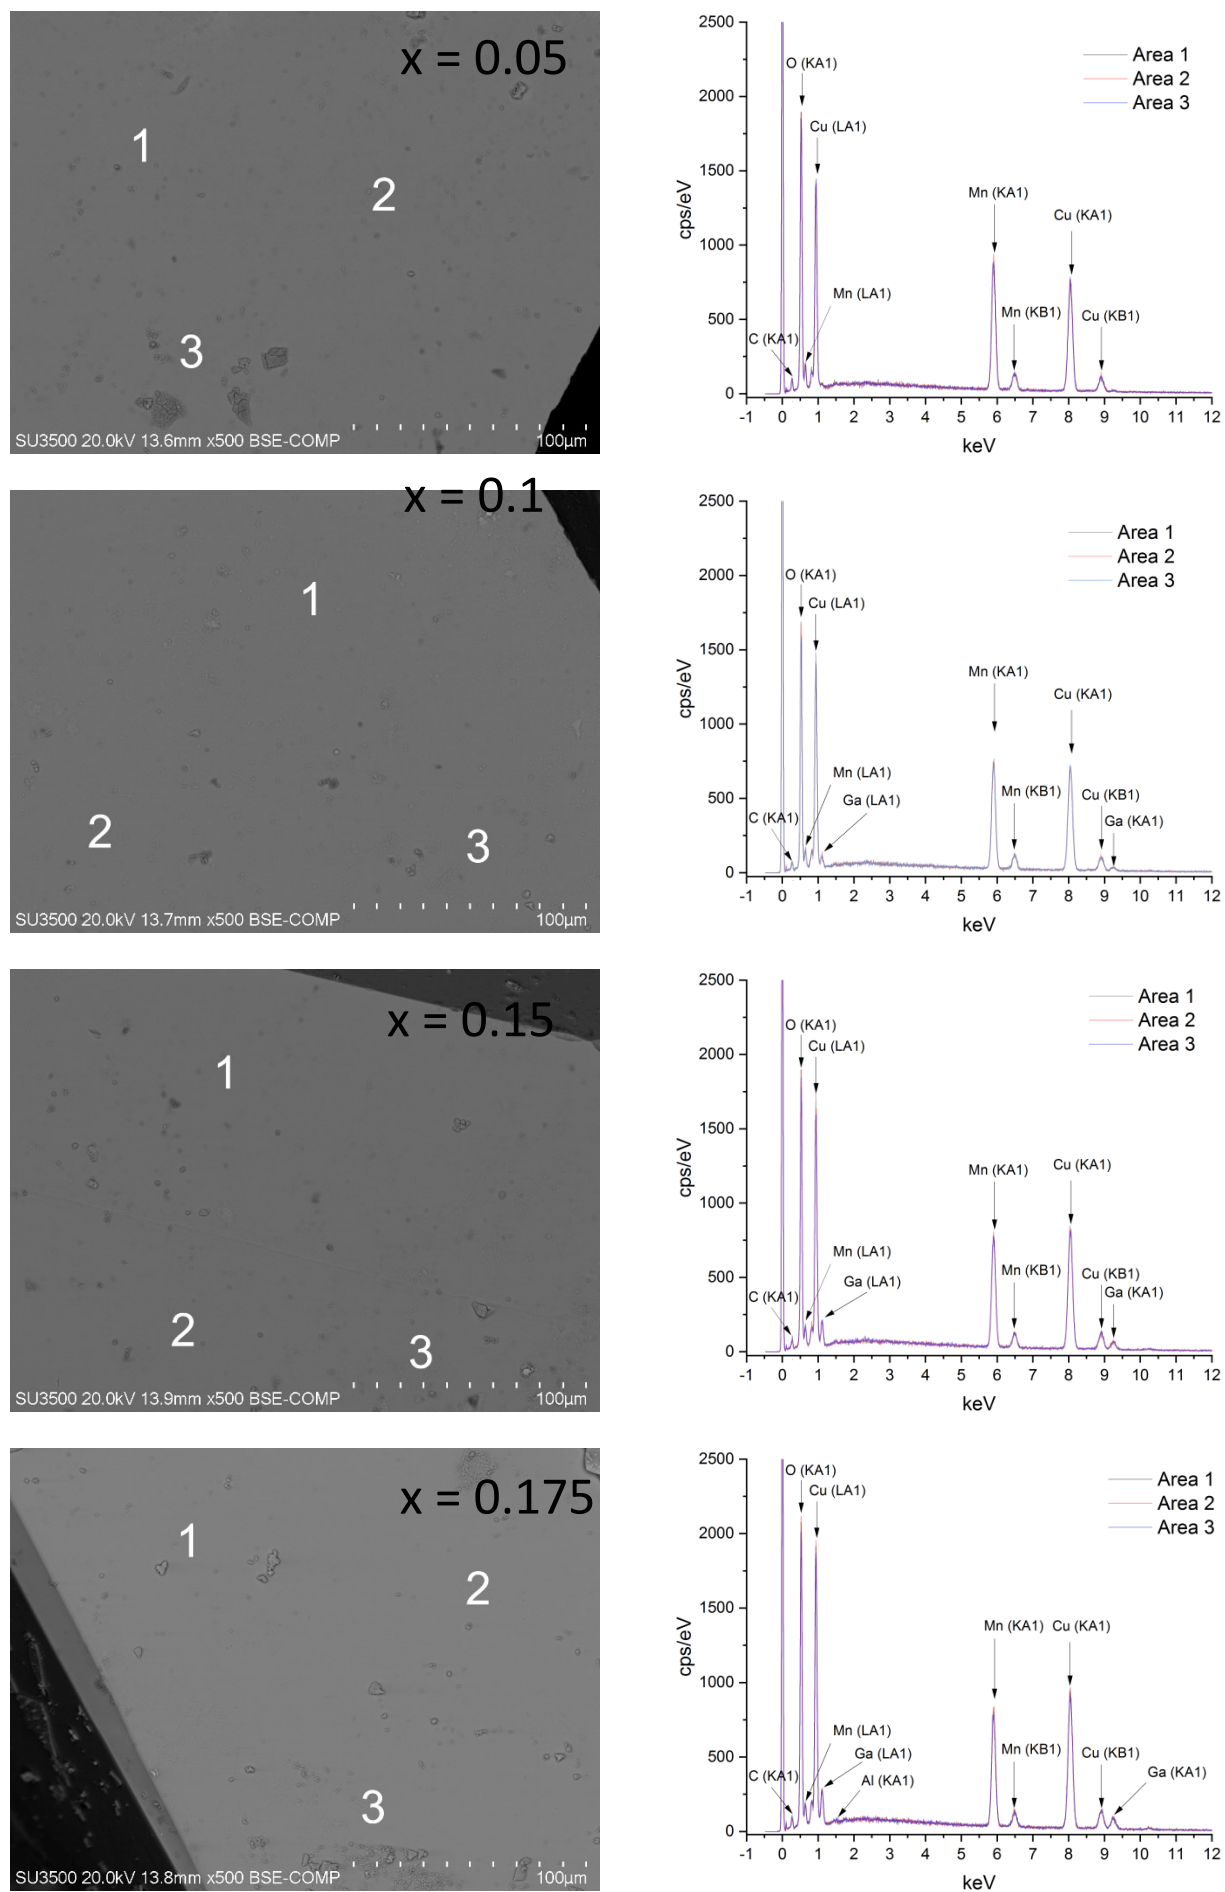

**Figure 1S.** Microphotographs of the studied crystals  $\text{Cu}_2\text{Ga}_{1-x}\text{Mn}_x\text{BO}_5$  ( $x = 0.05, 0.1, 0.15, 0.175$ ): the numbers indicate the scanned areas. The corresponding EDX spectra of different areas of the crystal samples are presented in the right column.

Table 1S. Fractional atomic coordinates and isotropic or equivalent isotropic displacement parameters ( $\text{\AA}^2$ ).

| Atom                                                                  | <i>x</i>      | <i>y</i>    | <i>z</i>    | $U_{\text{iso}}^*/U_{\text{eq}}$ | Occ.       |
|-----------------------------------------------------------------------|---------------|-------------|-------------|----------------------------------|------------|
| <b>Cu<sub>2</sub>Mn<sub>0.81</sub>Ga<sub>0.19</sub>BO<sub>5</sub></b> |               |             |             |                                  |            |
| Cu1                                                                   | 0.51834 (16)  | 0.72006 (5) | 0.50777 (6) | 0.0077 (2)                       | 0.751 (15) |
| Mn1                                                                   | 0.51834 (16)  | 0.72006 (5) | 0.50777 (6) | 0.0077 (2)                       | 0.199 (12) |
| Ga1                                                                   | 0.51834 (16)  | 0.72006 (5) | 0.50777 (6) | 0.0077 (2)                       | 0.050 (3)  |
| Cu2                                                                   | 0.5000        | 0.5000      | 1.0000      | 0.0076 (3)                       | 0.89 (3)   |
| Mn2                                                                   | 0.5000        | 0.5000      | 1.0000      | 0.0076 (3)                       | 0.09 (2)   |
| Ga2                                                                   | 0.5000        | 0.5000      | 1.0000      | 0.0076 (3)                       | 0.023 (5)  |
| Cu3                                                                   | 0.0000        | 0.5000      | 0.5000      | 0.0090 (3)                       | 0.59 (3)   |
| Mn3                                                                   | 0.0000        | 0.5000      | 0.5000      | 0.0090 (3)                       | 0.33 (2)   |
| Ga3                                                                   | 0.0000        | 0.5000      | 0.5000      | 0.0090 (3)                       | 0.082 (5)  |
| Cu4                                                                   | 0.98740 (18)  | 0.61996 (5) | 0.77052 (6) | 0.0090 (2)                       | 0.507 (18) |
| Mn4                                                                   | 0.98740 (18)  | 0.61996 (5) | 0.77052 (6) | 0.0090 (2)                       | 0.395 (14) |
| Ga4                                                                   | 0.98740 (18)  | 0.61996 (5) | 0.77052 (6) | 0.0090 (2)                       | 0.099 (4)  |
| B                                                                     | 0.9921 (16)   | 0.8635 (4)  | 0.7375 (6)  | 0.0104 (9)                       | 1          |
| O1                                                                    | 0.4820 (10)   | 0.6441 (2)  | 0.9034 (4)  | 0.0109 (6)                       | 1          |
| O2                                                                    | 1.0601 (10)   | 0.4629 (3)  | 0.8399 (3)  | 0.0112 (6)                       | 1          |
| O3                                                                    | 0.9858 (10)   | 0.7645 (3)  | 0.6643 (3)  | 0.0109 (6)                       | 1          |
| O4                                                                    | 0.0522 (10)   | 0.6357 (2)  | 0.3824 (4)  | 0.0107 (6)                       | 1          |
| O5                                                                    | 0.5983 (11)   | 0.5798 (3)  | 0.6093 (4)  | 0.0134 (7)                       | 1          |
| <b>Cu<sub>2</sub>Mn<sub>0.85</sub>Ga<sub>0.15</sub>BO<sub>5</sub></b> |               |             |             |                                  |            |
| Cu1                                                                   | 0.44439 (15)  | 0.98853 (5) | 0.22128 (4) | 0.0072 (2)                       | 0.836 (13) |
| Mn1                                                                   | 0.44439 (15)  | 0.98853 (5) | 0.22128 (4) | 0.0072 (2)                       | 0.139 (11) |
| Ga1                                                                   | 0.44439 (15)  | 0.98853 (5) | 0.22128 (4) | 0.0072 (2)                       | 0.025 (2)  |
| Cu2                                                                   | -0.05732 (16) | 0.73256 (5) | 0.12092 (4) | 0.0068 (2)                       | 0.244 (16) |
| Mn2                                                                   | -0.05732 (16) | 0.73256 (5) | 0.12092 (4) | 0.0068 (2)                       | 0.643 (13) |
| Ga2                                                                   | -0.05732 (16) | 0.73256 (5) | 0.12092 (4) | 0.0068 (2)                       | 0.113 (2)  |
| Cu3                                                                   | -0.5000       | 0.5000      | 0.0000      | 0.0068 (2)                       | 0.88 (2)   |
| Mn3                                                                   | -0.5000       | 0.5000      | 0.0000      | 0.0068 (2)                       | 0.099 (19) |
| Ga3                                                                   | -0.5000       | 0.5000      | 0.0000      | 0.0068 (2)                       | 0.017 (3)  |
| Cu4                                                                   | 0.0000        | 0.0000      | 0.0000      | 0.0090 (3)                       | 0.95 (2)   |
| Mn4                                                                   | 0.0000        | 0.0000      | 0.0000      | 0.0090 (3)                       | 0.05 (2)   |
| Ga4                                                                   | 0.0000        | 0.0000      | 0.0000      | 0.0090 (3)                       | 0.008 (4)  |
| B1                                                                    | 0.0926 (12)   | 0.2645 (4)  | 0.1341 (3)  | 0.0058 (7)                       | 1          |
| O1                                                                    | 0.4984 (8)    | 0.0956 (3)  | 0.3555 (2)  | 0.0098 (5)                       | 1          |
| O2                                                                    | 0.3615 (9)    | 0.8737 (3)  | 0.0873 (2)  | 0.0099 (5)                       | 1          |
| O3                                                                    | 0.0321 (8)    | 0.1191 (3)  | 0.1345 (2)  | 0.0098 (5)                       | 1          |
| O4                                                                    | -0.1067 (8)   | 0.6596 (3)  | -0.0365 (2) | 0.0090 (5)                       | 1          |
| O5                                                                    | 0.8695 (9)    | 0.8340 (3)  | 0.2660 (2)  | 0.0093 (5)                       | 1          |
